# Supplementary material
Source: HighWire-hosted journal article supplement (https://learnmem.cshlp.org/content/suppl/2023/12/19/30.12.325)
Supplement: Supplemental_Legends.docx [file Supplemental_Legends.docx]

**Supplemental materials**

**Figure S1.** **Spatiotemporal maps of BOLD signal during retrieval of control group (Ctrl) received PBS injection in Hit, Miss, FA and CR trial.** Map scale is in Z score. In each map, the interval between top red line and middle redline represent time that tone cue sustained, the interval between middle red line and bottom red line represents response window (RW). Each row represents an averaged whole-brain map in the rostral-caudal direction at a single temporal resolution frame (TR=0.5s). The column represents the time from 5s before the cue to 6s after the response window. Averaged lick rate over time throughout the trials is showed in the lower right corner. Behavior of licking during response window (RW) after 10 kHz tone cue was noted as Hit; Behavior of not licking during response window after 10 kHz tone cue was noted as Miss; Behavior of licking during response window after 2 kHz tone cue was noted as False Alarm (FA); Behavior of not licking during response window after 2 kHz tone cue was noted as correct rejection (CR).

**Figure S2.** **BOLD signal changes of the whole brain during retrieval in Hit, Miss, FA and CR trial of the control group received PBS injection.** The left red line means the start of tone cue; The middle red line means the end of the cue; The interval between middle red line and right red line means response window (RW), in which mice could lick to get water reward after 10 kHz tone cue. A row represents a single brain region activity from 5s before the cue to 6s after the response window. The blue line indicates p < 0.05 (two-way ANOVA, with FDR correction). X-axis unit represents a temporal resolution frame, 0.5s. Map scale is in Z scores.

**Figure S3.** **Scatter charts made with the BOLD signal in the 16th frame of the control group received PBS and CNO injection**. PBS administered trial is abscissa and CNO administered trial is ordinate. Each blue dot represents an activated memory-related brain region.

**Figure S4.** **BOLD signal changes of the whole brain during retrieval in Hit, Miss, FA and CR trial averaged across control-PBS and control-CNO subgroups.** The left red line means the start of tone cue; The middle red line means the end of the cue; The interval between middle red line and right red line means response window (RW), in which mice could lick to get water reward after 10 kHz tone cue. A row represents a single brain region activity from 5s before the cue to 6s after the response window. The blue line indicates p < 0.05 (two-way ANOVA with FDR correction). X-axis unit represents a temporal resolution frame, 0.5s. Map scale is in Z scores. Control-PBS and control-CNO represent group which receive injection of AAV8-hSyn-EGFP in MB during training and intraperitoneal injection of PBS or CNO during recall test, respectively.

**Figure S5.** **Time-signal curve of POST and LA in Hit, CR, Miss and FA trial averaged across control-PBS and control-CNO subgroups.** Significant differences in signals between Hit and Miss, CR and Miss, FA and Miss are respectively labelled by red, blue and black asterisks. Y-axis notes Z-score signal. POST, Postsubiculum. LA, Lateral Amygdala. Control-PBS and control-CNO represent group which receive injection of AAV8-hSyn-EGFP in Mammillary body (MB) before training and receive PBS or CNO intraperitoneal injection 1 hours before recall test, respectively (* p <0.05, * p <0.01, * p <0.001, two-way ANOVA with FDR correction).

**Figure S6. The Hit and FA rate during recall after three different training conditions.** (A) Training in MB-inhibited state (received injection of AAV8-hSyn-hM4D(Gi)-mCherry in MB and i.p. CNO daily, n=8). (B) Training in Common state (received injection of AAV8-hSyn-EGFP in MB and i.p. CNO daily, n=8). (C) Training in Common state (received injection of AAV8- hSyn-hM4D(Gi)-mCherry in MB and i.p. PBS daily, n=8). Hit, Behavior of licking during response window (RW) after 10 kHz tone cue; Miss, Behavior of not licking during response window RW after 10 kHz tone cue; False Alarm (FA), Behavior of licking during response windowRW after 2 kHz tone cue; Correct rejection (CR), Behavior of not licking during response window RW after 2 kHz tone cue. MB, Mammillary body. 1 block = 30 trials. (*p < 0.05 **** p < 0.0001, two-way ANOVA with FDR correction).

**Figure S7. Spatiotemporal maps of BOLD signal during recall after CNO/PBS injection in Hit, Miss, FA and CR trial of the experiment group which receive AAV8-hSyn-hM4D(Gi)-mCherry injection in MB before training.** (A) Spatiotemporal maps during recall in Hit, Miss, FA and CR trial in experiment group which receive CNO intraperitoneal injection before recall test. Map scale is in Z scores. In each map, the interval between top red line and middle redline represent time that tone cue sustained, the interval between middle red line and bottom red line represents response window (RW). Each row represents an averaged whole-brain map in the rostral-caudal direction at a single temporal resolution frame (TR=0.5s). The column represents the time from 5s before the cue to 6s after the response window. Averaged lick rate over time throughout the trials is showed in the lower right corner. (B) Similar to a, Spatiotemporal maps of experiment group which receive PBS intraperitoneal injection before recall test.

**Figure S8. BOLD signal changes during retrieval after MB-inhibition in Hit, Miss and CR.** The BOLD signal obtained during retrieval after PBS treatment in the two groups was subtracted from that after CNO injection. Then the Exp and Ctrl group was compared using linear mixed-effects model. The column represents brain regions analyzed. The row represents the time from 5s before the cue to 6s after the response window (RW). A unit of X-axis represents a temporal resolution frame, 0.5s. The left vertical red line means the onset of the tone cue; The middle vertical red line means the end of the tone cue; The interval between middle vertical red line and right vertical red line means response window. The red horizontal line indicates p < 0.05. Map scale is in Z scores.

**Figure S9.** (A) Diagrams of the projections from MB to ATN, from POST to RSPv and MB, and from ATN to POST and RSPv. (B) Sketches of different brain states among common (left), MB-inhibited(middle) and MB-disinhibited (right) conditions. The red and blue thick arrows represent the competitive relationship between HPC and AMG. The green and red line represent 10k and 2k wire respectively. The yellow circle indicates brain state modulation.

**Figure S10.** (A-C) Inhibition of the posterior part of POST generate no deficits on CR trials. (A) Expression of NphR3.0-eYFP in posterior part of POST. Scale bar, 800μm. (B) violin plot of hit rate in 10 kHz tone trial when laser is given or not (one-tailed, paired t test, n=10). (C) violin plot of correct rejection (CR) rate in 2 kHz tone trial when laser is given or not. (D-J) Inhibition on LA or POST did not affect decision making, as the optogenetic inhibition during the reward period.(D) Single trial timeline for optogenetic stimulation. In optogenetic stimulation trial, constant light laser was turned on, during 2s response window (RW). (E, H) Expression of NphR3.0-eYFP in Lateral Amygdala (LA) and Postsubiculum (POST). Scale bar, 800μm. (F, I) Violin plot of laser inhibition on LA(N=8) or POST(N=10) during response window show no influence to hit rate, comparing to laser off. (G, J) Laser inhibition on LA or POST during response window show no significantly influence to correction rejection (CR) rate (one-tailed, paired t test). Hit, Behavior of licking during response window after 10 kHz tone cue; CR, Behavior of not licking during response window after 2 kHz tone cue. Hit rate equals to Hit trial number divided by 10 kHz trial number, Correction rate equals to CR trial number divided by 2 kHz trial number.

**Movie S1. The BOLD signals in Hit, CR, Miss and FA trials of cue-dependent memory in the cortical areas in the Ctrl group.** The red dot in the upper left corner represents the onset of the cue. Time is marked in the lower right corner (s). Map scale is in Z scores. Hit, Behavior of licking during response window after 10 kHz tone cue; Miss, Behavior of not licking during response window after 10 kHz tone cue; False Alarm (FA), Behavior of licking during response window after 2 kHz tone cue; Correct rejection (CR), Behavior of not licking during response window after 2 kHz tone cue.

**Movie S2. The BOLD signals in Hit, CR, Miss and FA trials of cue-dependent memory in the subcortical brain nuclei in the Ctrl group.** The red dot in the upper left corner represents the onset of the cue. Time is marked in the lower right corner (s). Map scale is in Z scores. Hit, Behavior of licking during response window after 10 kHz tone cue; Miss, Behavior of not licking during response window after 10 kHz tone cue; False Alarm (FA), Behavior of licking during response window after 2 kHz tone cue; Correct rejection (CR), Behavior of not licking during response window after 2 kHz tone cue.
